# Supplementary material for: A genome resource for green millet Setaria viridis enables discovery of agronomically valuable loci
Source: PubMed Central journal article supplement (PMC7536120; doi:10.1038/s41587-020-0681-2), 2020-10-05
Supplement: 41587_2020_681_MOESM1_ESM.pdf [file 41587_2020_681_MOESM1_ESM.pdf]

---

**Supplementary information**

---

**A genome resource for green millet  
*Setaria viridis* enables discovery of  
agronomically valuable loci**

---

In the format provided by the  
authors and unedited

**Supplementary Figure 1.** Cumulative citations for *Setaria viridis*, from Scopus, accessed Jan. 2, 2020.

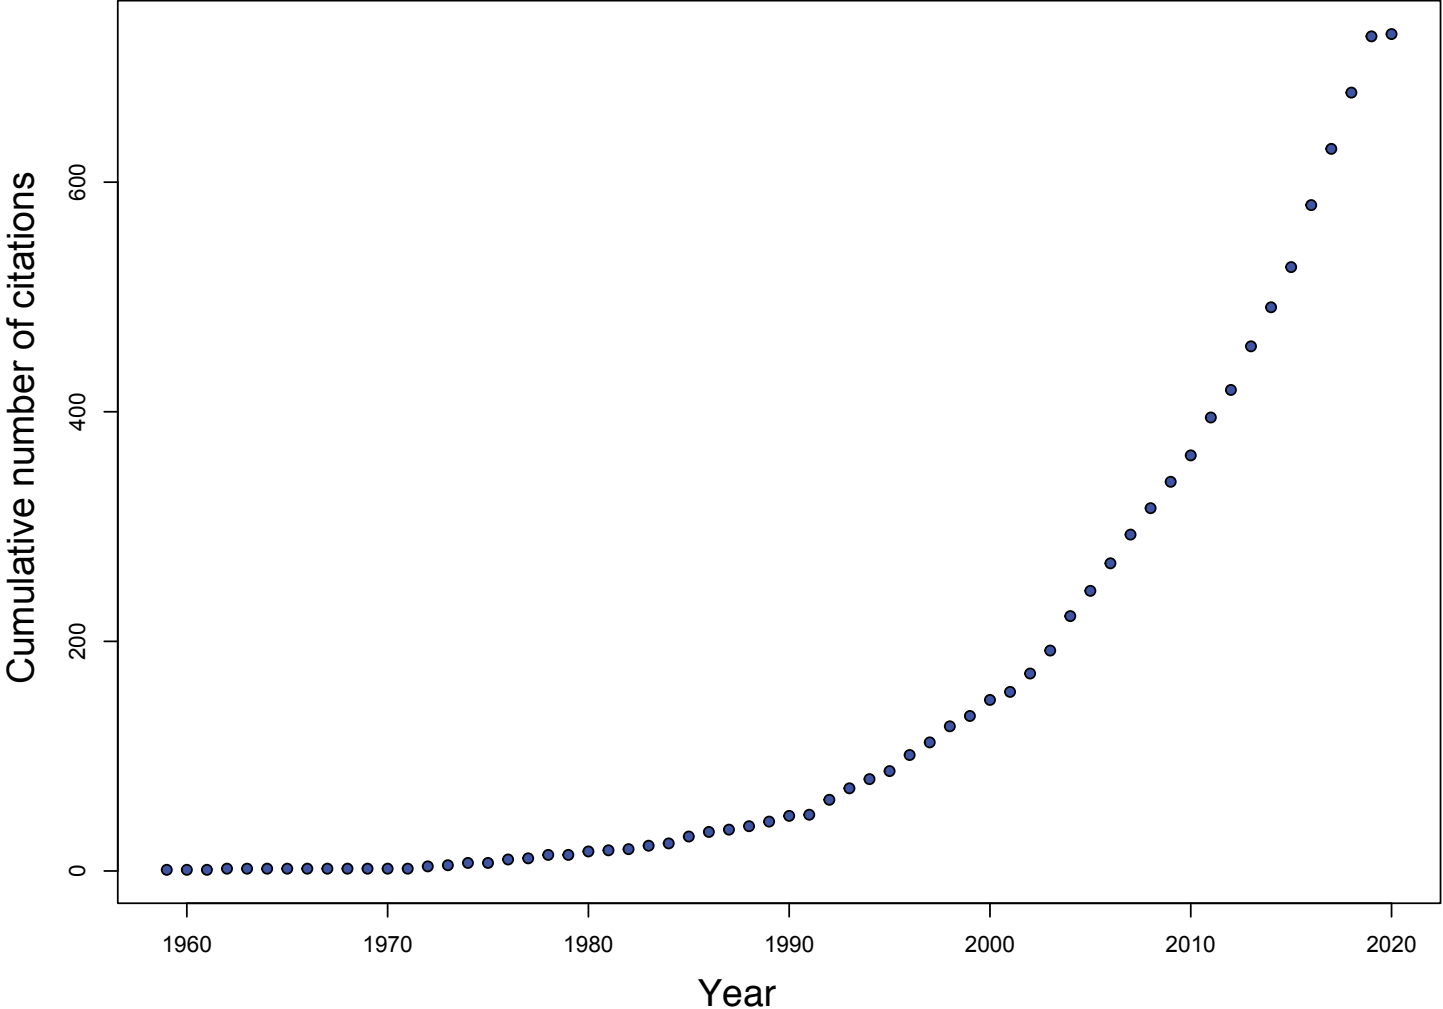

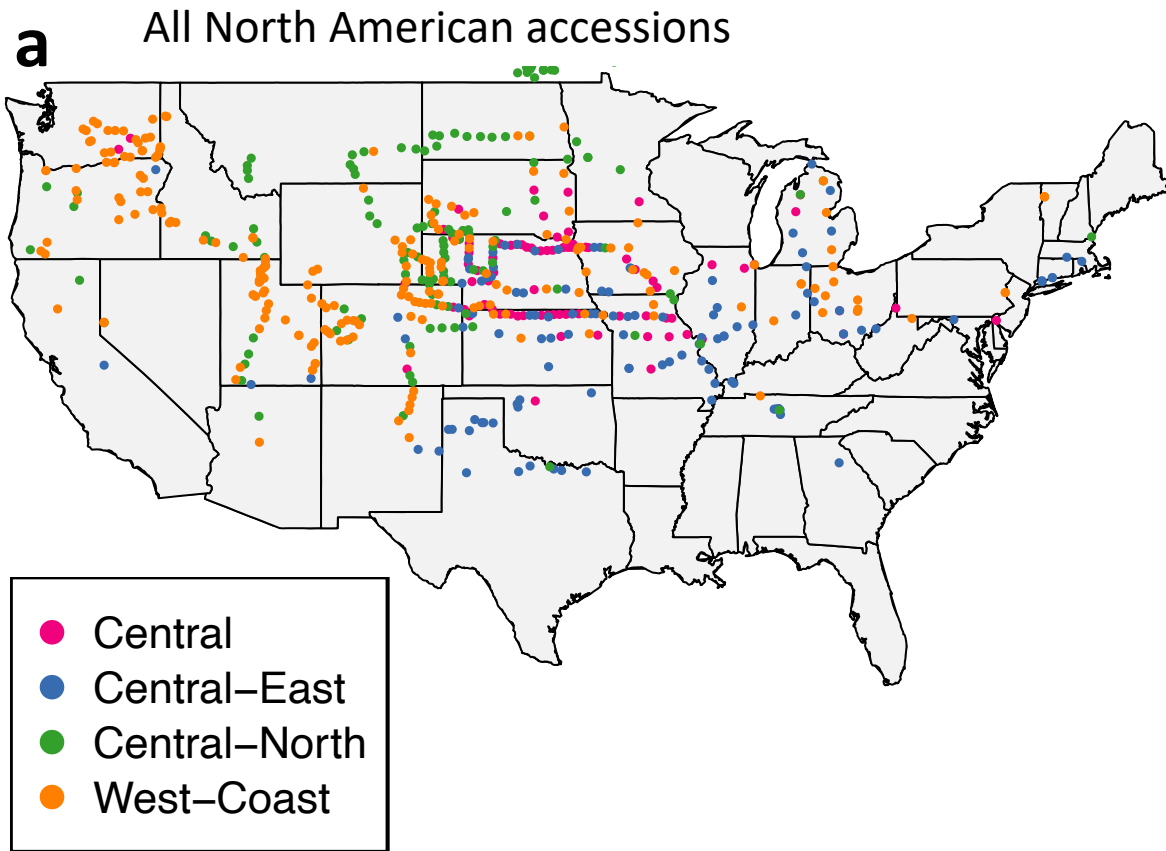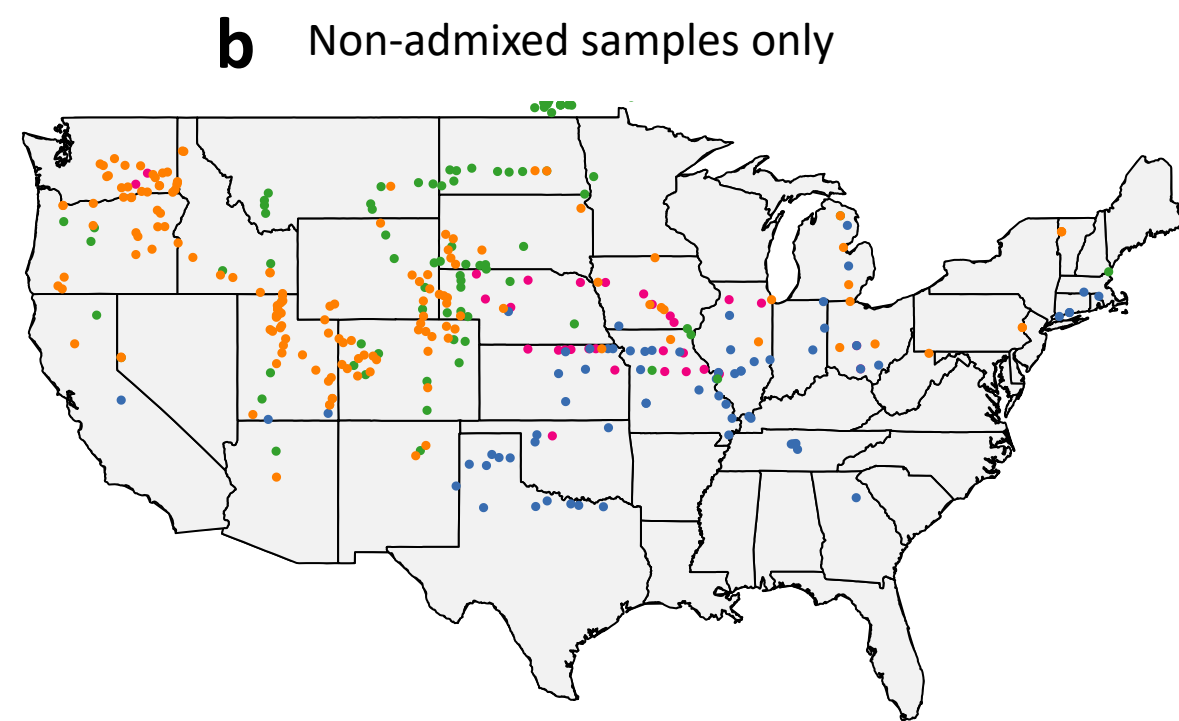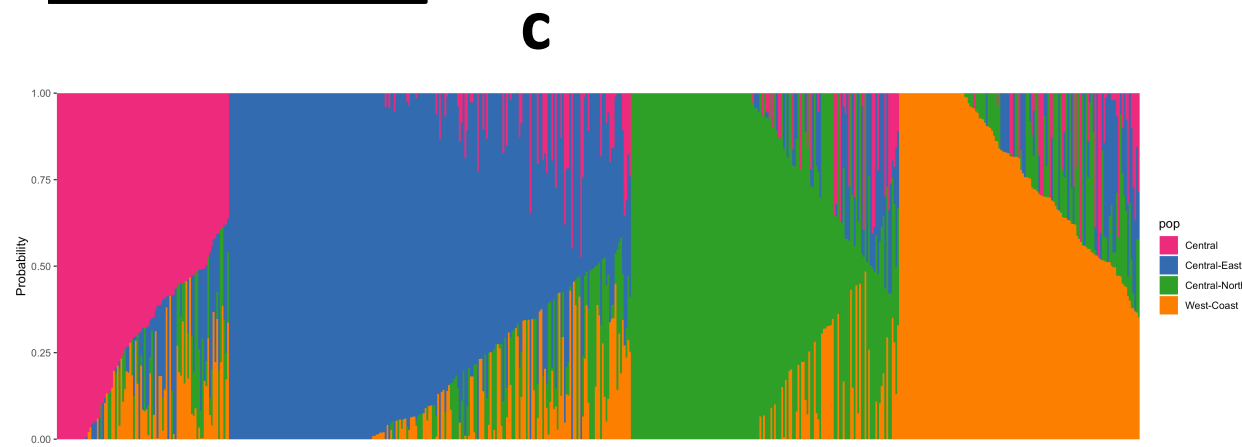

**Supplementary Figure 2.** Population distribution and structure of North American accessions. Population assignment based on SNPs. **a**, distribution of all accessions; **b**, distribution of non-admixed samples only; **c**, STRUCTURE plot including all accessions.

### Supplementary Figure 3.

Over-represented GO categories and KEGG enriched pathways for each subpopulation.

Enrichment of GO terms was tested using the “classic” algorithm and two-sided Fisher's exact test with  $p < 0.05$  considered as significant. KEGG pathway

enrichment analysis was based on a hypergeometric distribution test and pathways with  $p < 0.05$

were considered as enriched. No adjustments were made for multiple tests.

Central-East

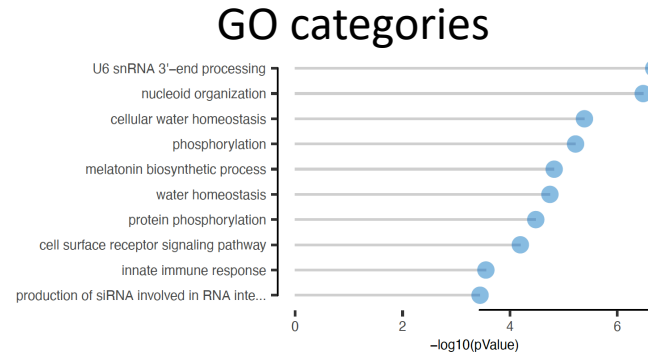

Central-North

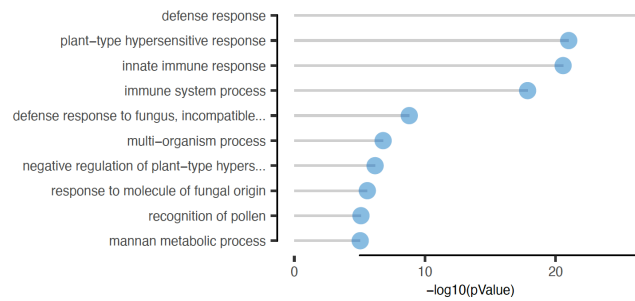

Central

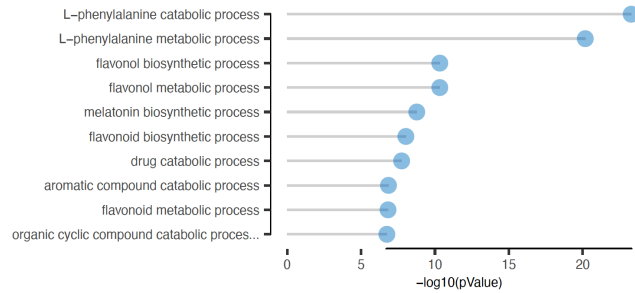

West-coast

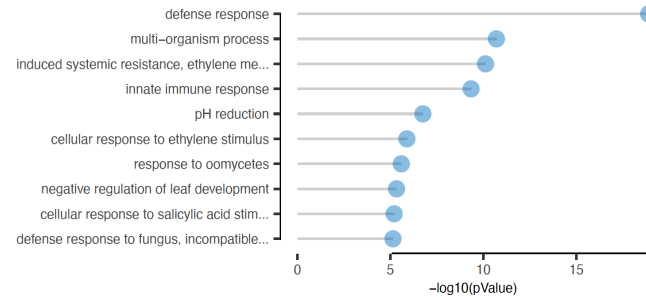

#### Enriched KEGG pathways

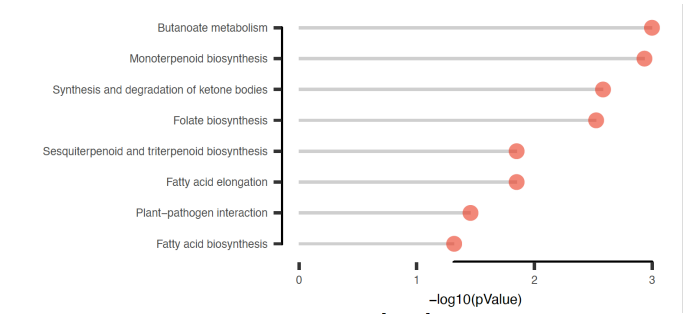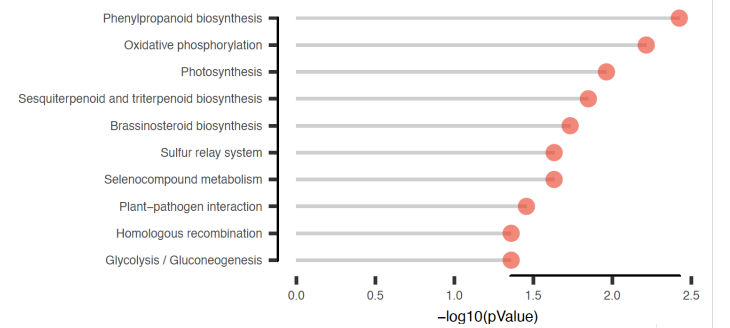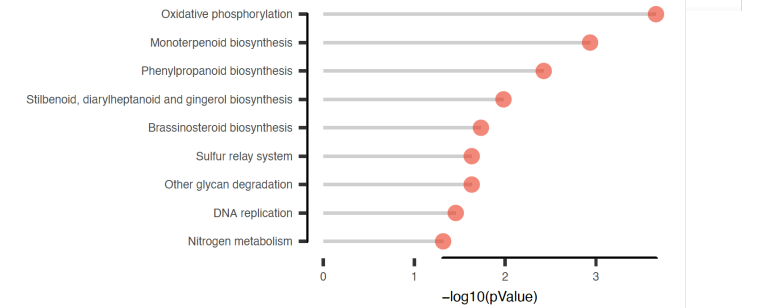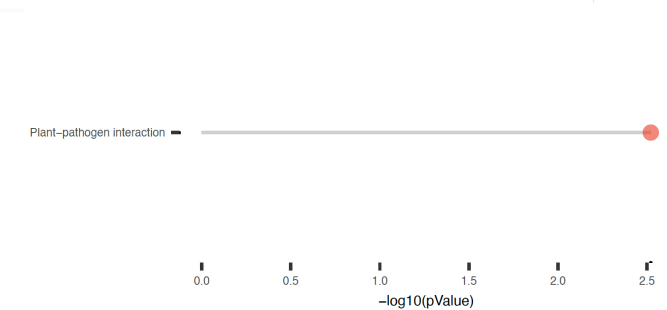



**Supplementary Figure 4.** Correlations among the bioclim variables for the 577 samples with lat-long coordinates.

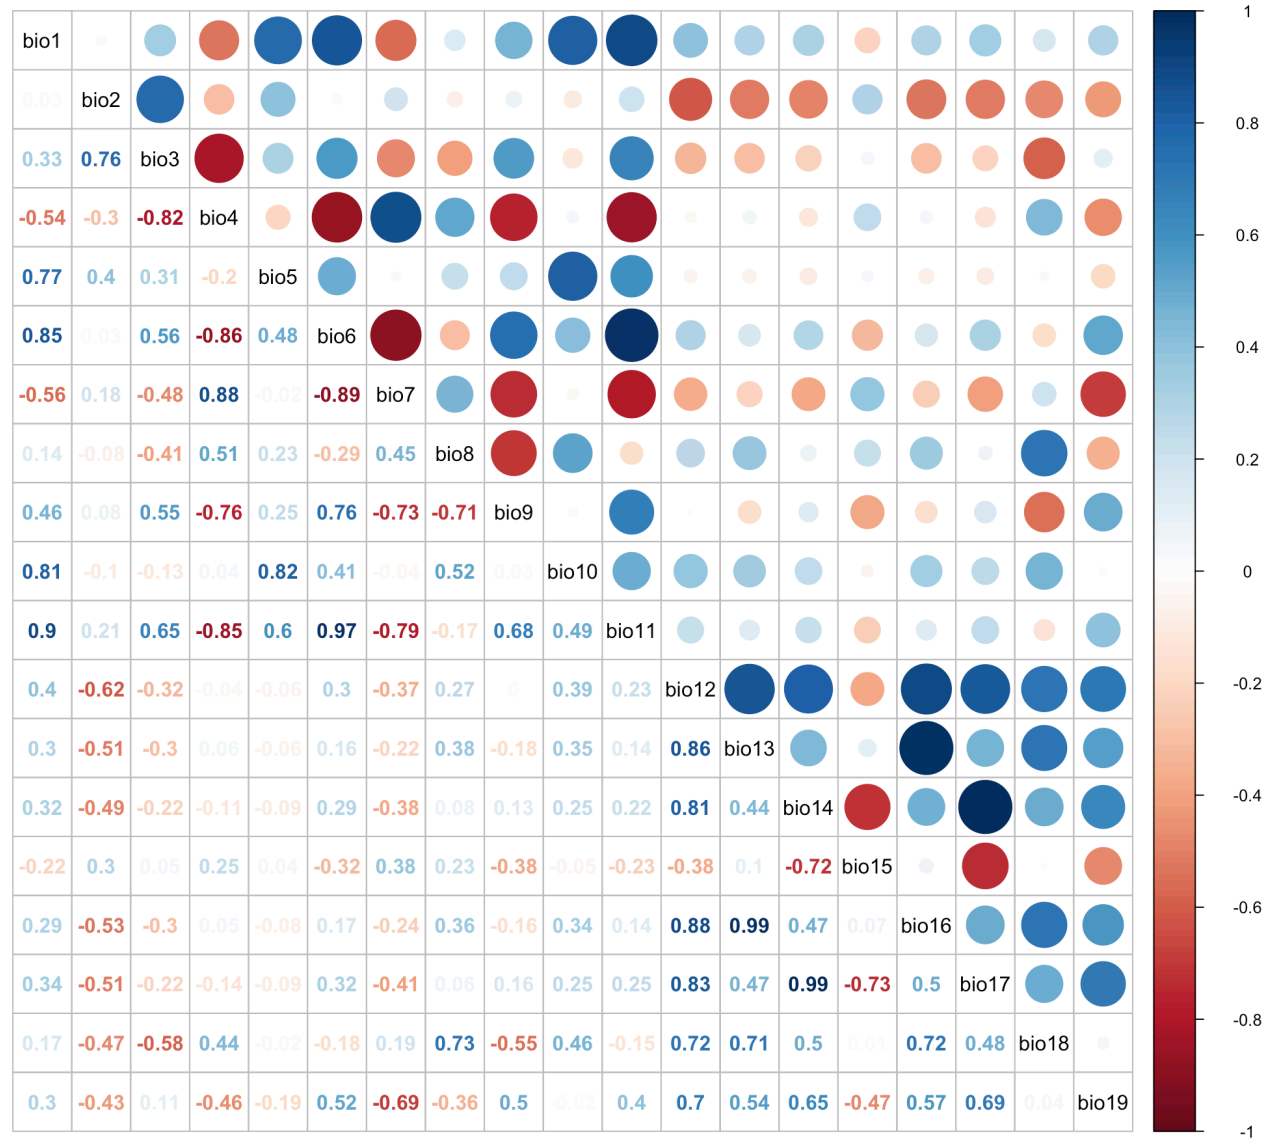

**Supplementary Figure 5.** GWAS results using each of the first three environmental PCs as response variable. PC1 found no significant loci, PC2 found one, and PC3 found several.

PC1

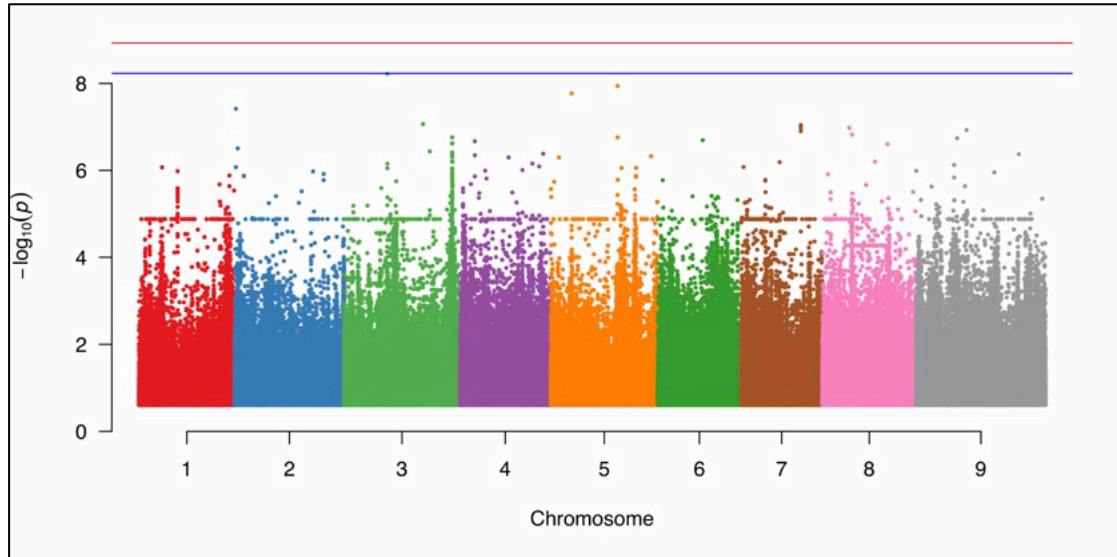

PC2

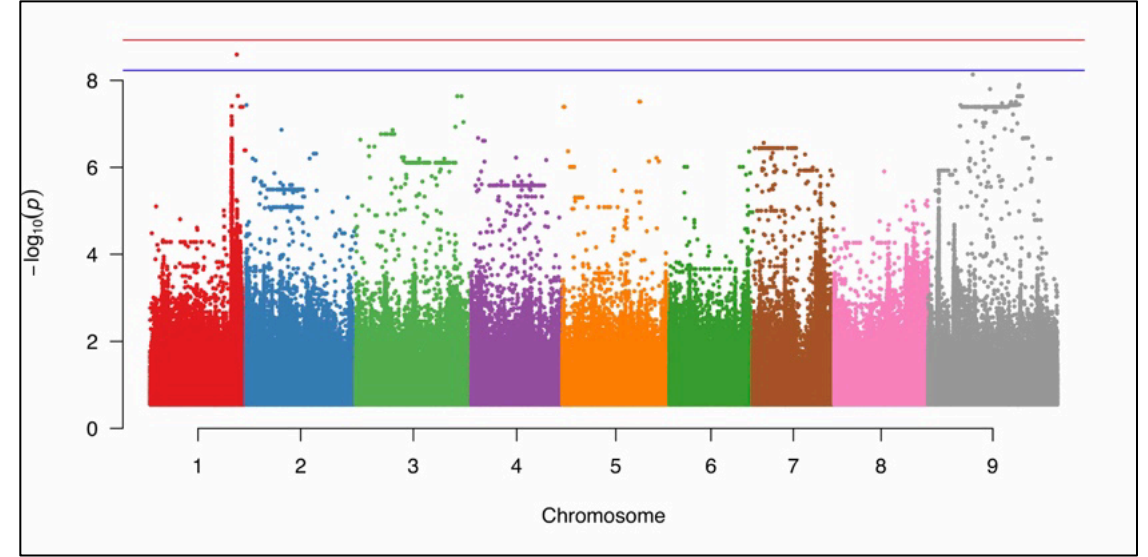

PC3

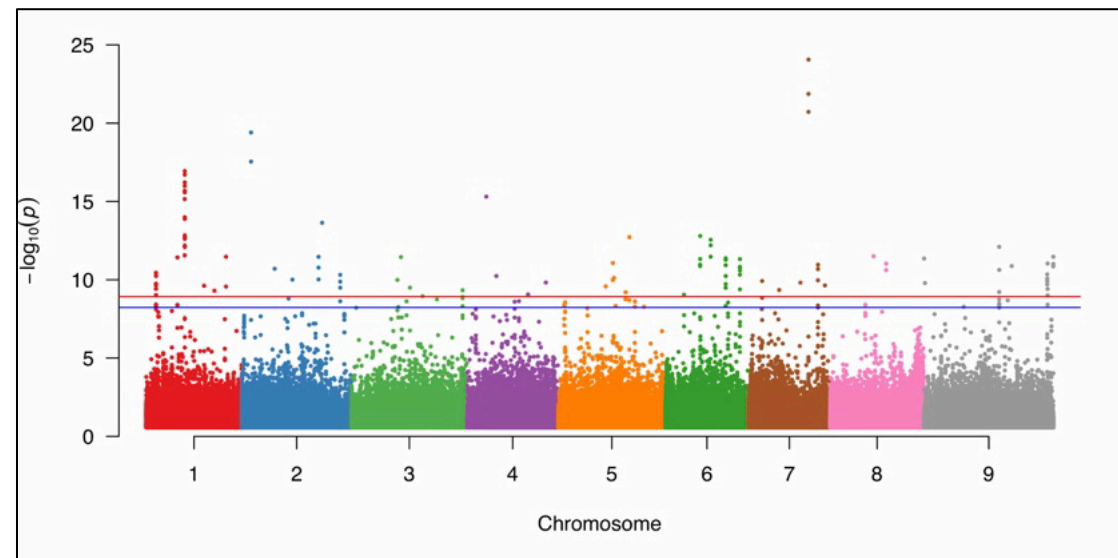

**Supplementary Figure 6.** Loci showing significant signatures of selection for each population. Left column, proportion of SNP with  $|iHS| > 2$  for each of the population. Right column, Tajima's D represented in -ve scale. 100 Kbp windows (slide 10 Kbp). Horizontal lines represent 95th and 99th percentiles for  $iHS$  and 1st and 5th percentiles for Tajima's D.

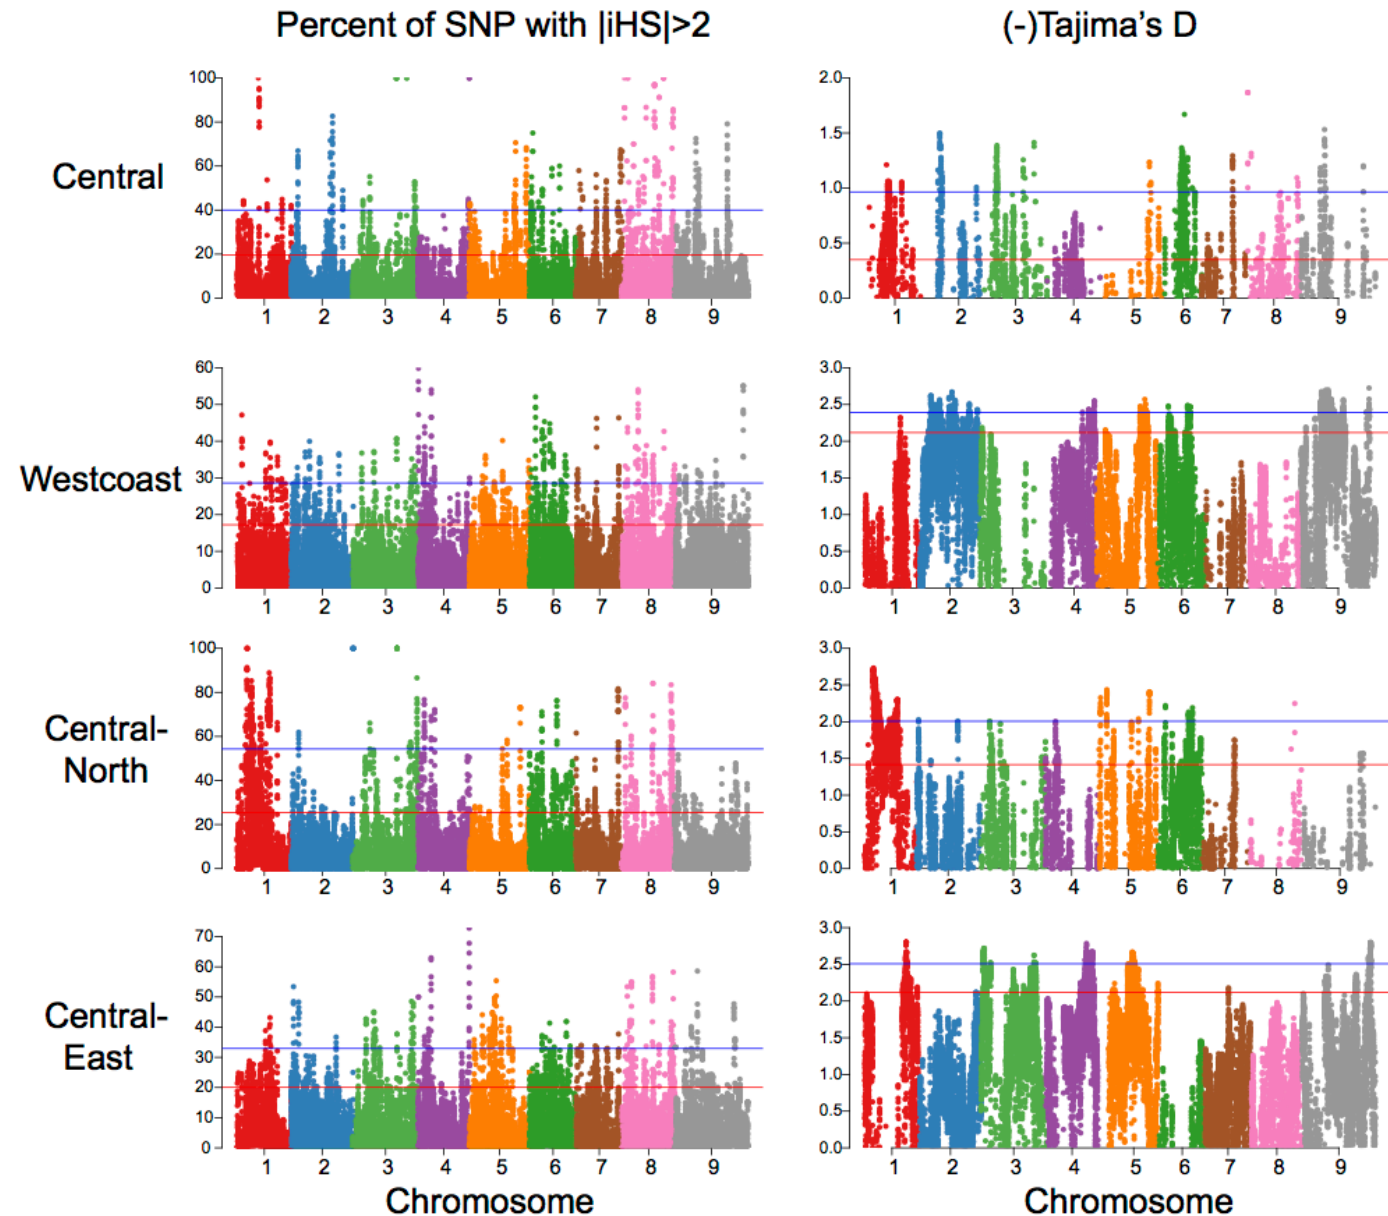

**Supplementary Figure 7. a** Comparison of seed germination rates of *SvLes1-1* and *SvLes1-CRISPR1* lines. Seeds were divided among four plates for each genotype (technical replicates), percent germination calculated for each plate at each time point, and then averaged within genotype. The experiment was repeated three times (biological replicates) with 83, 55, and 95 seeds of *SvLes1-1* (WT) for the three experiments, and 163, 112, 147 seeds of *SvLes1-CRISPR1*. Black horizontal line is median, hinges are first and third quartiles, whiskers are 1.5 times the interquartile range, filled circles are outliers. **b**, Comparison of seed weight of *SvLes1-1* and *SvLes1-CRISPR1* lines. Twenty-seed weight was measured from 5 independent plants of *SvLes1-1* and 10 of *SvLes1-CRISPR1*. *SvLes1-CRISPR1* seeds weighed significantly less ( $p = 3.22E-05$ ; 2-tailed T-test for 2 samples, unequal variances), but this did not affect germination. Error bars and symbols as in 7a.

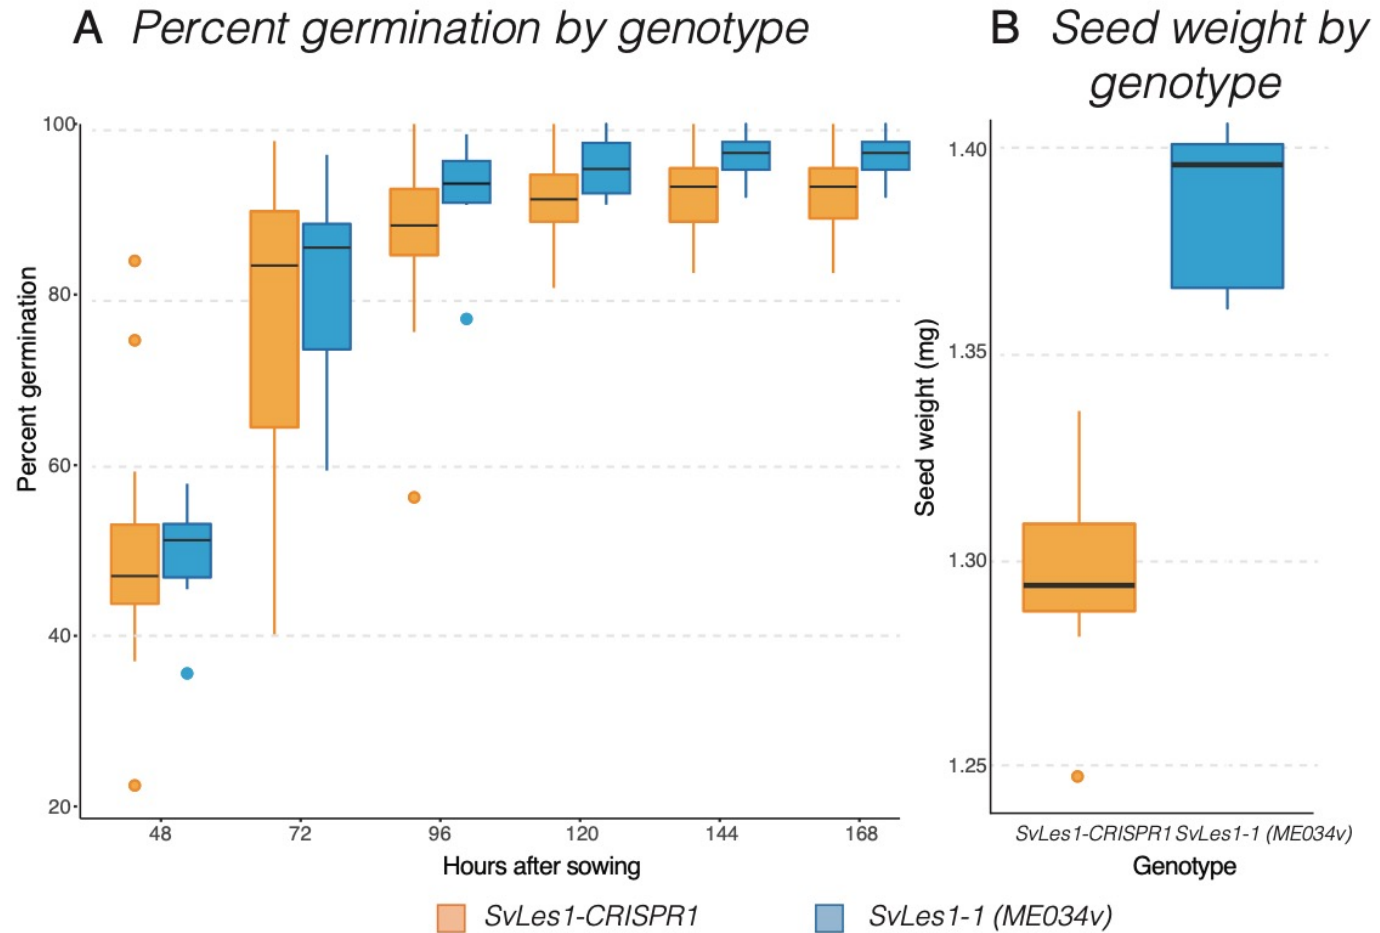



**Supplementary Figure 8.** *SvLes1-2* (A10.1), *SvLes1-1*, and *SvLes1-CRISPR1* have similar anatomical structures in the abscission zone. Spikelets from main panicles 12 days after heading, stained with 0.05% Toluidine blue O. **a,b** *SvLes1-2* (A10.1). **c,d** *SvLes1-1*. **e,f** *SvLes1-CRISPR1*. **a,c,e** Scale bars = 100  $\mu$ m. **b,d,f** Scale bars = 20  $\mu$ m. En, endosperm; em, embryo. White dotted line, approximate position of AZ. Experiments were repeated on three independent plants of each genotype.

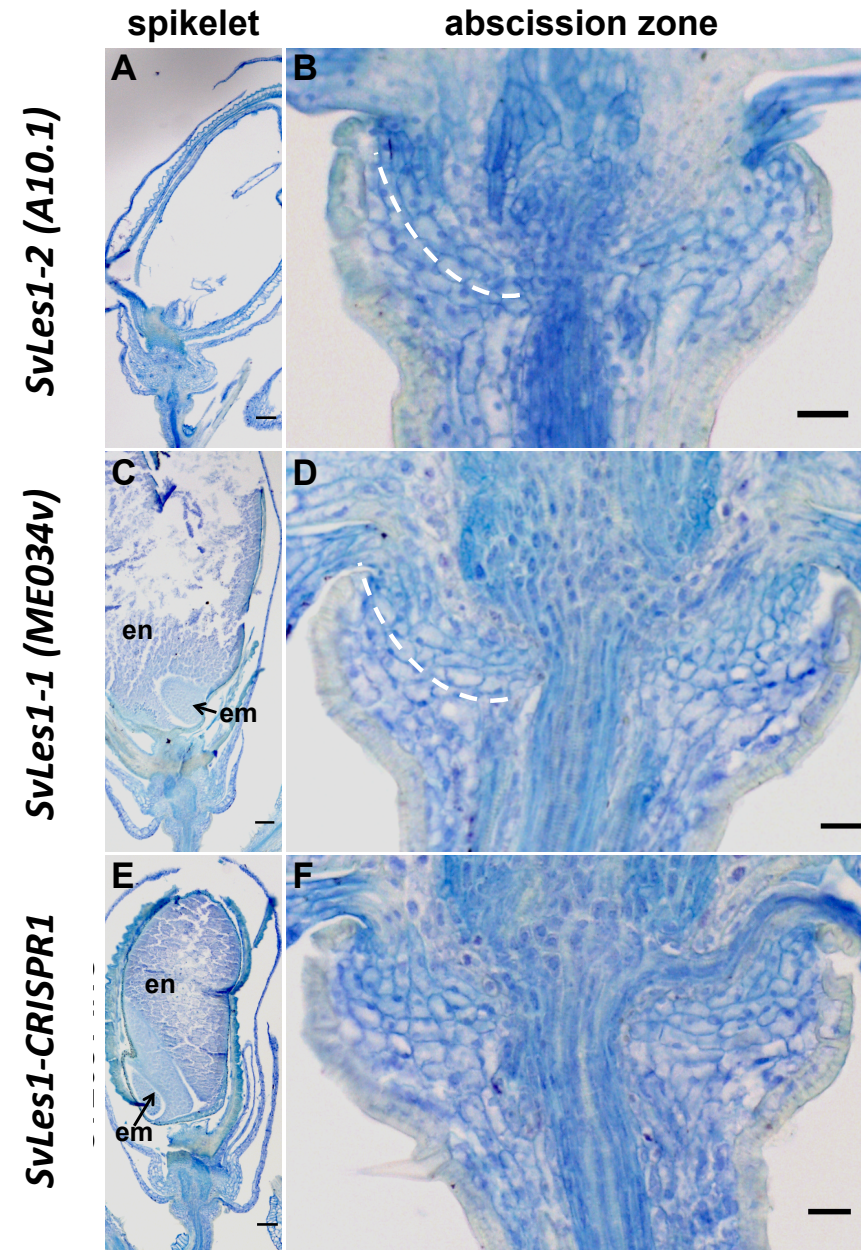

**Supplementary Figure 9.** Phylogenetic tree of *Copia38* copies in A10.1 and Yugu1 genomes. Red clade shows the recent explosion that contains the copy inserted into *SiLES1*. Gene models in green, *S. italica*; in blue, *S. viridis*.

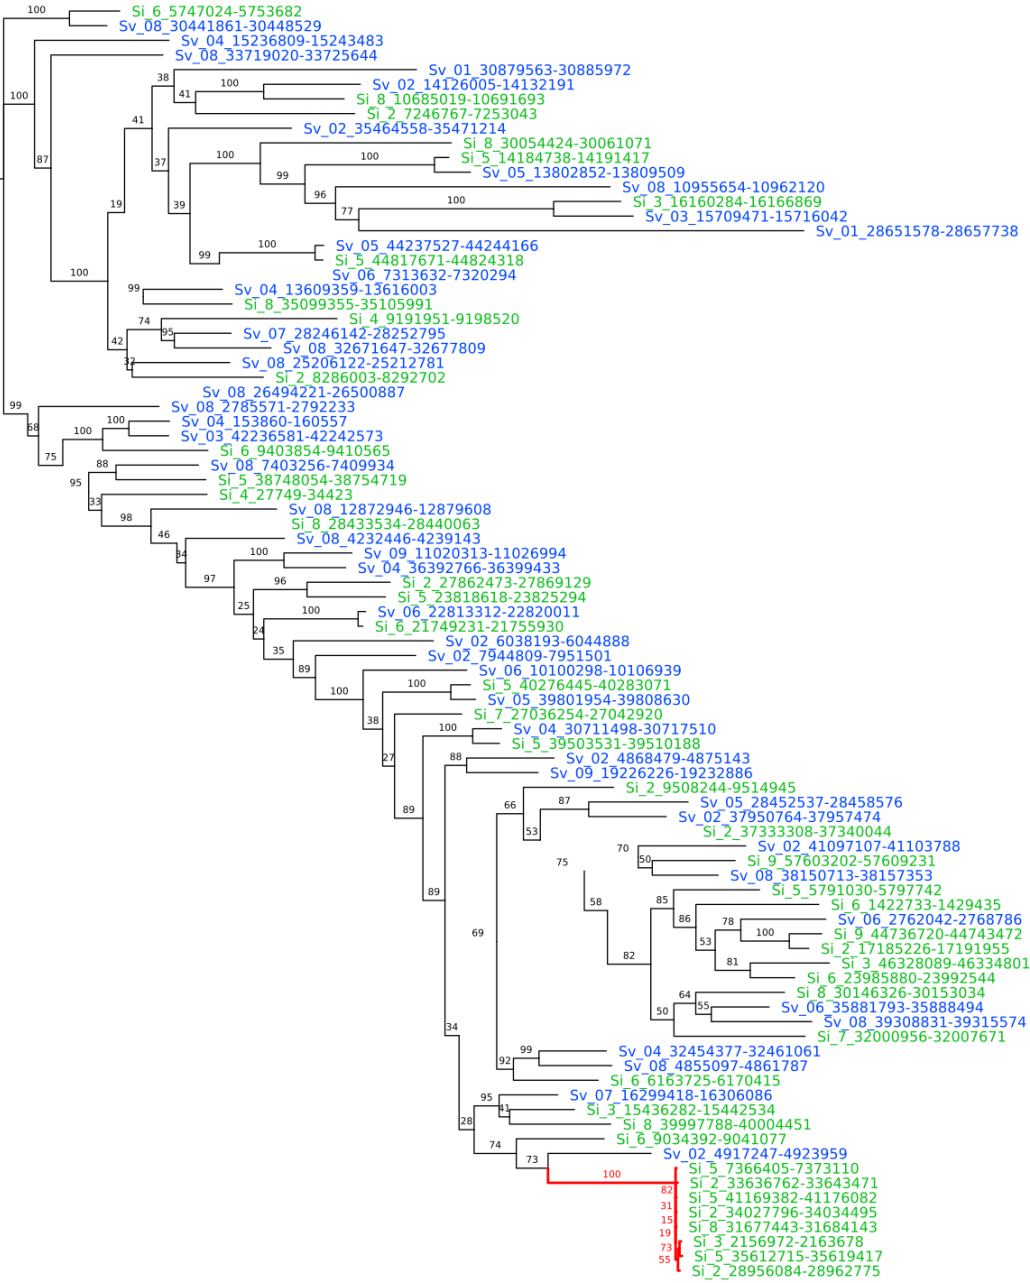

## Supplementary Figure 10.

Representative dot plots. **a** Dot plot of clone 114809 on a region of scaffold\_1. This alignment is representative of the high quality clone alignments in 239 of the 365 available clones. **b** Dot plot of clone 113526 on a region of scaffold\_3, which is representative of the 36 clones that landed in repetitive regions of the genome.

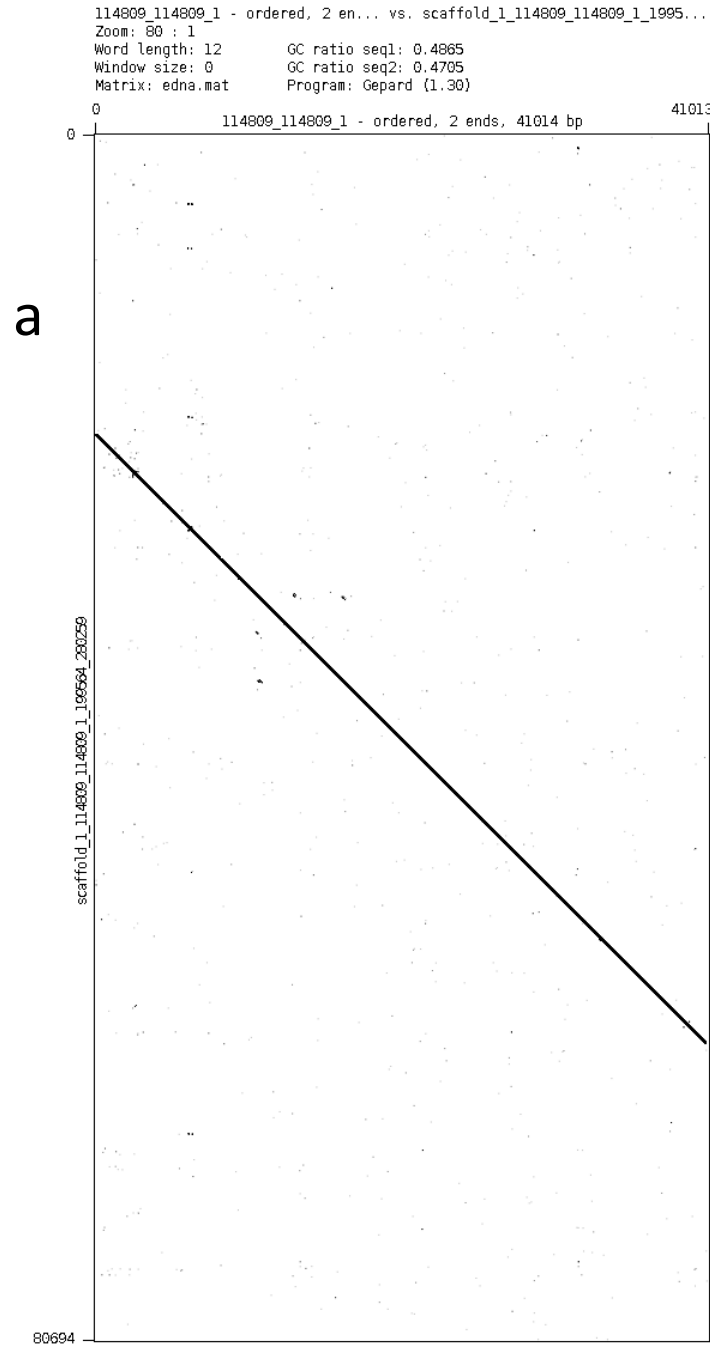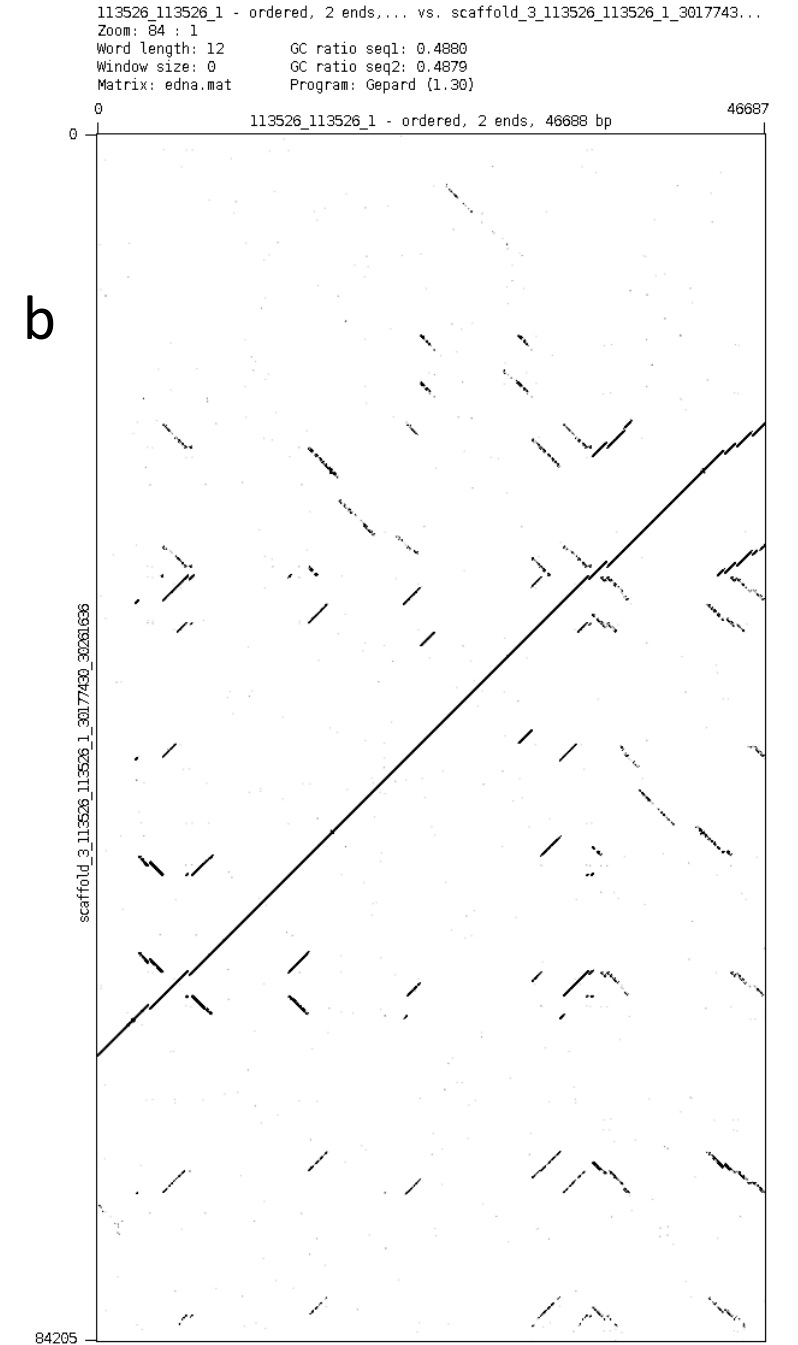

**Supplementary Figure 11.** Plots of marker placements for each of the 9 chromosomes (scaffolds) of *Setaria viridis*.

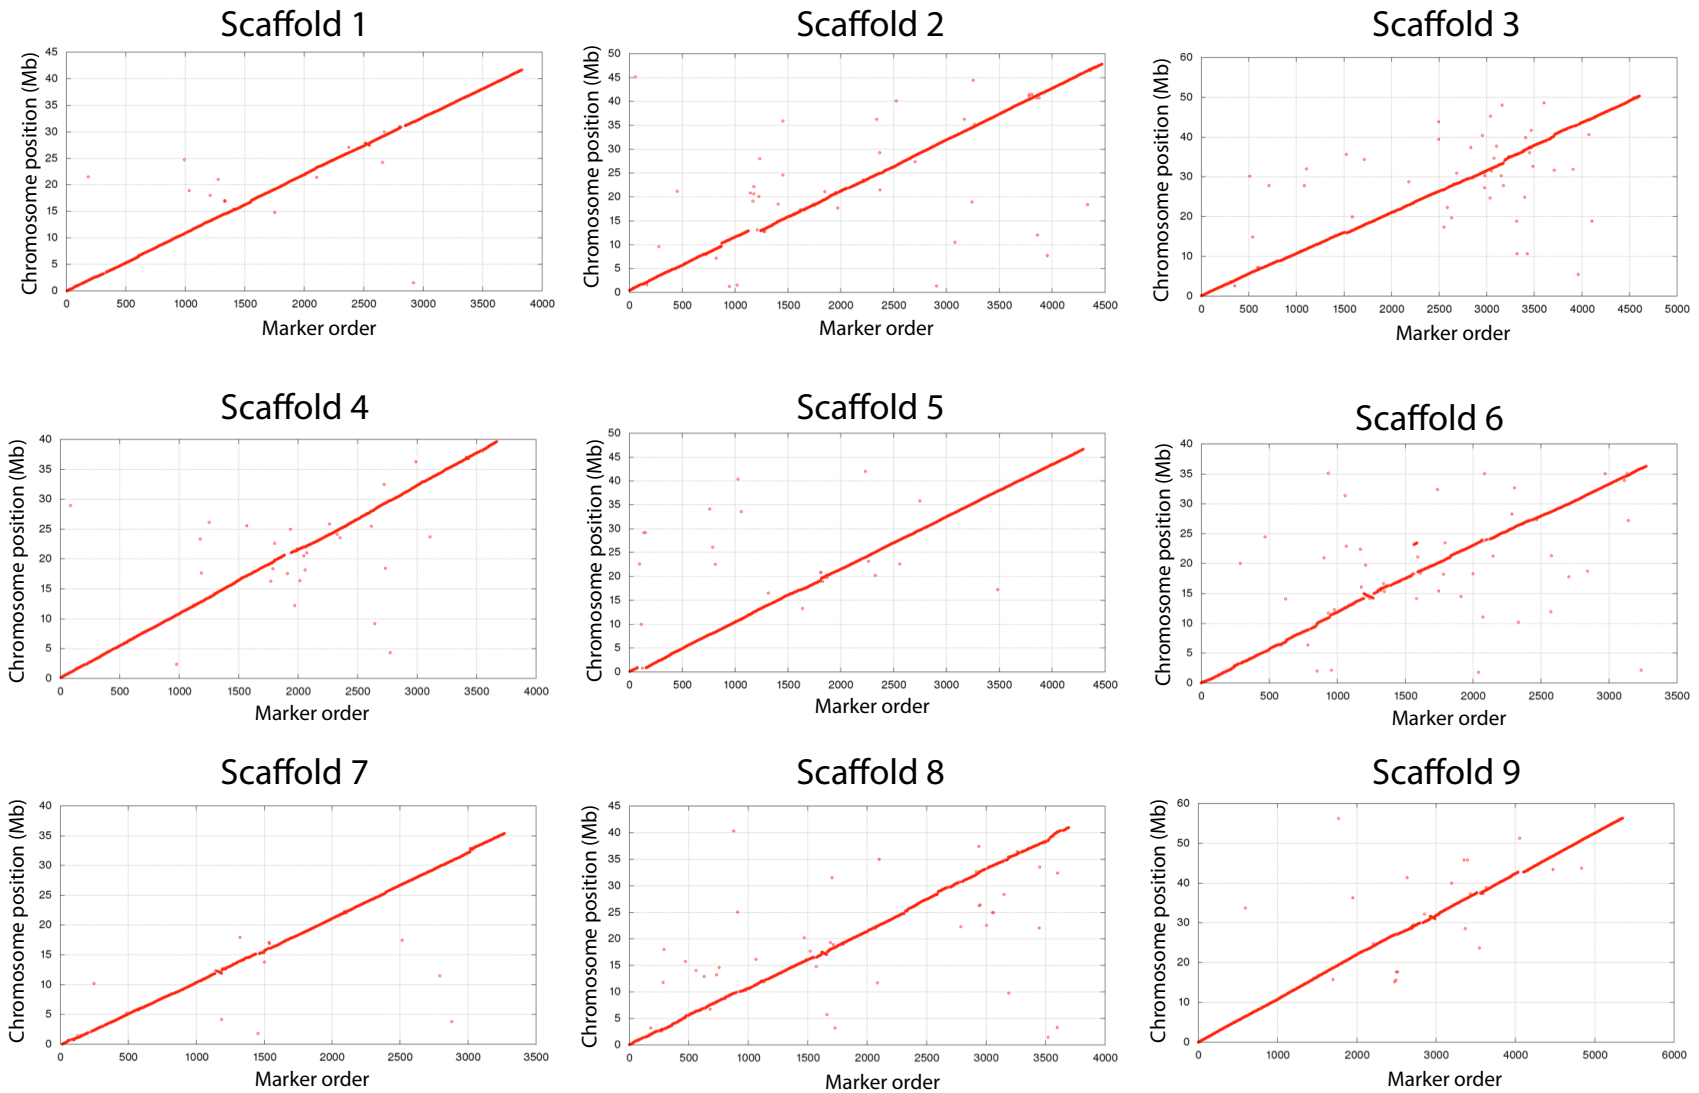



**Supplementary Figure 12. a** guide RNA protospacers and their position relative to allelic mutations and gene model. **b** Method used to detect *Copia38* insertion.

**a**

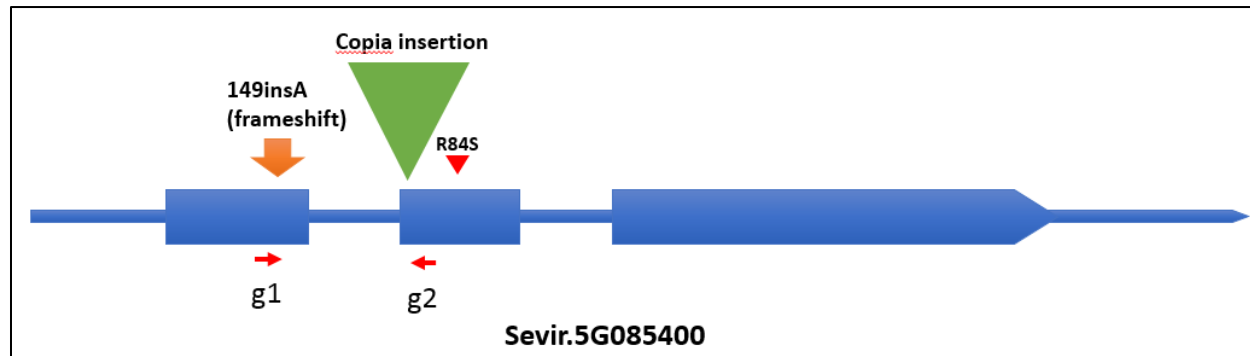

**b**

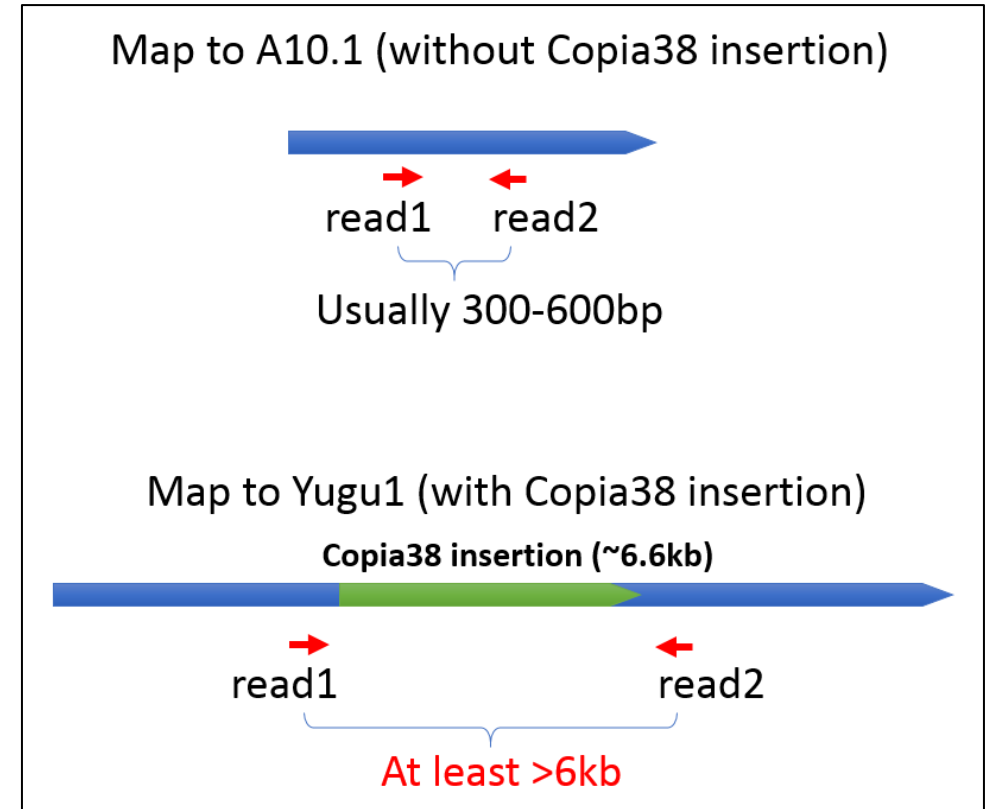

**Supplementary Table 2.** Subpopulation statistics. Numbers of non-admixed individuals based on SNP analysis; numbers used for each subpopulation in the PAV analysis are lower because not all libraries assembled well enough to be used. Number of over-represented genes is the number significant for that subpopulation alone. SNP, single nucleotide polymorphism; Pi/bp, polymorphisms per basepair; IBD, identity by descent for the subpopulation; IBS, identity by state for the subpopulation; LD, linkage disequilibrium; LD  $R^2 \geq 0.7\%$ , percent of pairwise comparisons with  $LD \geq 0.7$ .

| Subpopulation                          | Central    | Central East | Central North | Westcoast  |
|----------------------------------------|------------|--------------|---------------|------------|
| # non-admixed individuals              | 44         | 81           | 104           | 153        |
| Unique SNPs                            | 836,585    | 21,747       | 368,608       | 183,712    |
| Pi/bp                                  | 0.00457657 | 0.00235105   | 0.00373323    | 0.00259107 |
| #over-represented genes                | 748        | 482          | 1904          | 435        |
| Subpopulation-specific private alleles | 24         | 0            | 20            | 1          |
| IBD - Average (kb)                     | 55.5021427 | 138.839981   | 162.239224    | 129.683235 |
| IBS_average                            | 8.2458E-05 | 1.6934E-05   | 2.3011E-05    | 1.998E-05  |
| LD mean                                | 0.2544468  | 0.4378058    | 0.3899508     | 0.4481402  |

|                        |       |       |       |       |
|------------------------|-------|-------|-------|-------|
| (LD $R^2 \geq 0.7$ ) % | 0.167 | 0.359 | 0.306 | 0.365 |
|------------------------|-------|-------|-------|-------|

**Supplementary Table 4.** Loadings of bioclim variables on the first three principal components. PC, principal component; min, minimum; max, maximum.

| Variable code | Variable name                    |        |        |        |
|---------------|----------------------------------|--------|--------|--------|
|               |                                  | PC1    | PC2    | PC3    |
| bio6          | Min temperature warmest month    | -0.326 | -0.191 | -0.089 |
| bio11         | Mean temperature coldest quarter | -0.305 | -0.204 | -0.185 |
| bio1          | Annual mean temperature          | -0.300 | -0.072 | -0.324 |
| bio19         | Precipitation coldest quarter    | -0.299 | 0.047  | 0.268  |
| bio12         | Annual precipitation             | -0.278 | 0.276  | 0.037  |
| bio17         | Precipitation driest quarter     | -0.277 | 0.191  | 0.162  |
| bio14         | Precipitation driest month       | -0.264 | 0.194  | 0.155  |
| bio9          | Mean temperature driest quarter  | -0.223 | -0.273 | 0.127  |
| bio16         | Precipitation wettest quarter    | -0.203 | 0.281  | -0.049 |
| bio13         | Precipitation wettest month      | -0.196 | 0.279  | -0.067 |
| bio10         | Mean temperature warmest quarter | -0.173 | 0.092  | -0.448 |
| bio5          | Max temperature warmest month    | -0.108 | -0.127 | -0.468 |
| bio3          | Isothermality                    | -0.094 | -0.349 | -0.057 |
| bio18         | Precipitation warmest quarter    | -0.078 | 0.364  | -0.168 |
| bio8          | Mean temperature wettest quarter | 0.048  | 0.260  | -0.361 |
| bio2          | Mean diurnal temperature range   | 0.112  | -0.283 | -0.206 |
| bio15         | Precipitation seasonality        | 0.196  | -0.010 | -0.240 |
| bio4          | Temperature seasonality          | 0.245  | 0.288  | -0.058 |
| bio7          | Temperature annual range         | 0.315  | 0.151  | -0.146 |

**Supplementary Table 9.** Comparison of pairwise diversity in the region surrounding *SiLes1* vs. *SvLes1*. 100,000 coalescent simulations were conducted for  $\pi$ *italica*/ $\pi$ *viridis* under a domestication bottleneck model for a window of 20 kb centered on the gene. Strength of the bottleneck was determined by genome wide  $\pi$ *italica*/ $\pi$ *viridis*. Estimated values in the simulation were then compared to observed values  $\pi$ *italica*/ $\pi$ *viridis*. The observed values for  $\pi$ *italica*/ $\pi$ *viridis* were well below most values for the simulated data, with  $p=0.0066$ .

| Description      | Start   | End     | Length (bp) | $\pi$ <i>italica</i> | $\pi$ <i>viridis</i> | <i>italica</i> SNP | <i>viridis</i> SNP | $\pi$ <i>italica</i> / $\pi$ <i>viridis</i> |
|------------------|---------|---------|-------------|----------------------|----------------------|--------------------|--------------------|---------------------------------------------|
| Gene             | 6847970 | 6850236 | 2266        | 1.2650               | 4.4274               | 5                  | 21                 | 0.2857                                      |
| 10kb total       | 6844103 | 6854103 | 10000       | 3.2352               | 50.1570              | 96                 | 189                | 0.0645                                      |
| 20kb total       | 6839103 | 6859103 | 20000       | 6.3833               | 135.5472             | 245                | 460                | 0.0471                                      |
| 50kb total       | 6824103 | 6874103 | 50000       | 20.9668              | 286.5908             | 717                | 1001               | 0.0732                                      |
| 10kb either side | 6837970 | 6860236 | 22266       | 7.0845               | 159.3458             | 300                | 545                | 0.0445                                      |
| 20kb either side | 6827970 | 6870236 | 42266       | 20.3942              | 247.2280             | 640                | 871                | 0.0825                                      |
| 50kb either side | 6797970 | 6900236 | 102266      | 39.1945              | 959.0633             | 1129               | 3233               | 0.0408                                      |

**Supplementary Table 10.** Comparison of linkage disequilibrium (LD) in the region surrounding *SiLes1* vs. *SvLes1*. Intervals as in Table S9.

| Description      | Start   | End     | Length (bp) | <i>Setaria viridis</i> |                           |                           | <i>Setaria italica</i> |                           |                           |
|------------------|---------|---------|-------------|------------------------|---------------------------|---------------------------|------------------------|---------------------------|---------------------------|
|                  |         |         |             | Mean                   | % of comp. ( $\geq 0.5$ ) | % of comp. ( $\geq 0.7$ ) | Mean                   | % of comp. ( $\geq 0.5$ ) | % of comp. ( $\geq 0.7$ ) |
| Gene             | 6847970 | 6850236 | 2266        | 0.23                   | 22.07                     | 20.69                     | 0.80                   | 100.00                    | 100.00                    |
| 10kb total       | 6844103 | 6854103 | 10000       | 0.23                   | 19.37                     | 14.60                     | 0.96                   | 100.00                    | 100.00                    |
| 20kb total       | 6839103 | 6859103 | 20000       | 0.26                   | 24.78                     | 15.28                     | 0.97                   | 100.00                    | 100.00                    |
| 50kb total       | 6824103 | 6874103 | 50000       | 0.29                   | 27.17                     | 20.68                     | 0.30                   | 25.91                     | 25.91                     |
| 10kb either side | 6837970 | 6860236 | 22266       | 0.27                   | 25.63                     | 17.36                     | 0.98                   | 100.00                    | 100.00                    |
| 20kb either side | 6827970 | 6870236 | 42266       | 0.28                   | 25.63                     | 19.51                     | 0.30                   | 25.91                     | 25.91                     |
| 50kb either side | 6797970 | 6900236 | 102266      | 0.27                   | 22.68                     | 16.64                     | 0.46                   | 42.35                     | 42.13                     |

**Supplementary Table 11.** Genomic libraries included in the *Setaria viridis* genome assembly and their respective assembled sequence coverage levels in the final release.

\*Average read length of PACBIO reads.

| <b>Library</b> | <b>Sequencing Platform</b> | <b>Assembly Release</b> | <b>Average Read/Insert Size</b> | <b>Read Number</b> | <b>Assembled Sequence Coverage (X)</b> |
|----------------|----------------------------|-------------------------|---------------------------------|--------------------|----------------------------------------|
| H0022          | Illumina                   | 2.0                     | 800                             | 425,635,116        | 240                                    |
|                | PACBIO                     | 2.0                     | 10,587*                         | 4,768, 857         | 118.18                                 |

**Supplementary Table 12.** PACBIO library statistics for the libraries included in the *Setaria viridis* genome assembly and their respective assembled sequence coverage levels.

| <b>Cutoff</b> | <b>Number of Reads</b> | <b>Basepairs</b> | <b>Average Read Length</b> | <b>Coverage</b> |
|---------------|------------------------|------------------|----------------------------|-----------------|
| 0             | 4,768,857              | 59,091,859,660   | 10,587                     | 118.18x         |
| 1,000         | 4,427,654              | 58,922,852,295   | 11,597                     | 117.85x         |
| 2,000         | 4,128,899              | 58,477,661,257   | 12,522                     | 116.96x         |
| 3,000         | 3,875,244              | 57,847,410,625   | 13,346                     | 115.69x         |
| 4,000         | 3,653,717              | 57,073,702,495   | 14,086                     | 114.15x         |
| 5,000         | 3,442,812              | 56,125,591,515   | 14,820                     | 112.25x         |
| 6,000         | 3,238,591              | 55,003,123,843   | 15,551                     | 110.01x         |
| 7,000         | 3,041,062              | 53,719,962,620   | 16,270                     | 107.44x         |
| 8,000         | 2,850,014              | 52,287,501,523   | 16,979                     | 104.58x         |
| 9,000         | 2,665,092              | 50,716,192,061   | 17,681                     | 101.43x         |
| 10,000        | 2,486,248              | 49,017,650,265   | 18,373                     | 98.04x          |
| 11,000        | 2,314,198              | 47,211,798,377   | 19,049                     | 94.42x          |
| 12,000        | 2,148,024              | 45,301,509,765   | 19,727                     | 90.60x          |
| 13,000        | 1,990,291              | 43,330,677,398   | 20,385                     | 86.66x          |
| 14,000        | 1,839,724              | 41,298,472,587   | 21,043                     | 82.60x          |
| 15,000        | 1,696,209              | 39,218,281,557   | 21,692                     | 78.44x          |
| 16,000        | 1,557,328              | 37,065,930,006   | 22,354                     | 74.13x          |
| 17,000        | 1,422,360              | 34,839,361,404   | 23,034                     | 69.68x          |
| 18,000        | 1,291,347              | 32,547,099,163   | 23,740                     | 65.09x          |
| 19,000        | 1,163,251              | 30,177,734,218   | 24,475                     | 60.36x          |



**Supplementary Table 13.** Summary statistics of the initial output of the QUIVER polished MECAT assembly. The table shows total contigs and total assembled basepairs for each set of scaffolds greater than the size listed in the left hand column.

| <b>Minimum Scaffold Length</b> | <b>Number of Scaffolds</b> | <b>Number of Contigs</b> | <b>Scaffold Size</b> | <b>Basepairs</b> | <b>% Non-gap Basepairs</b> |
|--------------------------------|----------------------------|--------------------------|----------------------|------------------|----------------------------|
| 5 Mb                           | 25                         | 25                       | 347,994,520          | 347,994,520      | 100.00%                    |
| 2.5 Mb                         | 33                         | 33                       | 378,539,963          | 378,539,963      | 100.00%                    |
| 1 Mb                           | 40                         | 40                       | 389,332,751          | 389,332,751      | 100.00%                    |
| 500 Kb                         | 44                         | 44                       | 392,513,339          | 392,513,339      | 100.00%                    |
| 250 Kb                         | 49                         | 49                       | 394,501,069          | 394,501,069      | 100.00%                    |
| 100 Kb                         | 53                         | 53                       | 395,090,738          | 395,090,738      | 100.00%                    |
| 50 Kb                          | 77                         | 77                       | 396,626,132          | 396,626,132      | 100.00%                    |
| 25 Kb                          | 107                        | 107                      | 397,813,004          | 397,813,004      | 100.00%                    |
| 10 Kb                          | 110                        | 110                      | 397,864,082          | 397,864,082      | 100.00%                    |
| 5 Kb                           | 110                        | 110                      | 397,864,082          | 397,864,082      | 100.00%                    |
| 2.5 Kb                         | 110                        | 110                      | 397,864,082          | 397,864,082      | 100.00%                    |
| 1 Kb                           | 110                        | 110                      | 397,864,082          | 397,864,082      | 100.00%                    |
| 0 bp                           | 110                        | 110                      | 397,864,082          | 397,864,082      | 100.00%                    |

**Supplementary Table 14.** Final summary assembly statistics for chromosome scale assembly. Scaffold sequence total is all bases in the release plus gaps. Chromosome sequence is all bases in the chromosomes not including gaps. Total bases is all bases in the release excluding gaps.

|                                |              |
|--------------------------------|--------------|
| <b>Scaffold total</b>          | 14           |
| <b>Contig total</b>            | 75           |
| <b>Scaffold sequence total</b> | 395.7 Mb     |
| <b>Chromosome Sequence</b>     | 394.9 Mb     |
| <b>Total bases</b>             | 395.1 Mb     |
| <b>Scaffold N/L50</b>          | 4 / 46.7 Mb  |
| <b>Contig N/L50</b>            | 11 / 11.2 Mb |
